# Supplementary material
Source: PubMed Central journal article supplement (PMC2576500)

**Warts Is Required for PI3K-Regulated  
Growth Arrest, Autophagy,  
and Autophagic Cell Death in *Drosophila***

Sudeshna Dutta and Eric H. Baehrecke

**SUPPLEMENTAL FIGURES**

**Figure S1. Co-Expression of Yki and Sd induces premature degradation of salivary glands.** (A-B) Paraffin sections of animals co-expressing Yki and Sd. Expression of Yki and Sd in salivary glands leads to premature degradation of salivary glands at 6 hours after puparium formation (A) and salivary glands are completely degraded by 24 hours after puparium formation (B).

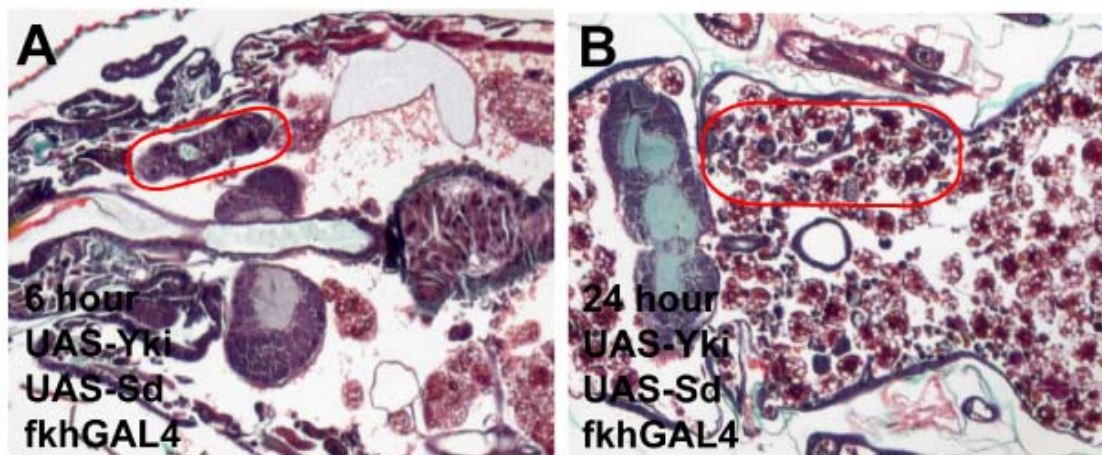

**Figure S2. *wts* mutants do not have altered Akt and P-Akt protein levels in salivary glands.** Immunoblot showing the levels of Akt and its activated form phosphorylated Akt (P-Akt) in salivary glands during larval and pupal stages in *wts<sup>P2</sup>* homozygous mutant animals. The lanes contain salivary gland extracts isolated from feeding larvae (FL), wandering larvae (WL), 0 and 6 hours after puparium formation, and 1.5 hours after head eversion in *wts<sup>P2</sup>* mutant animals.

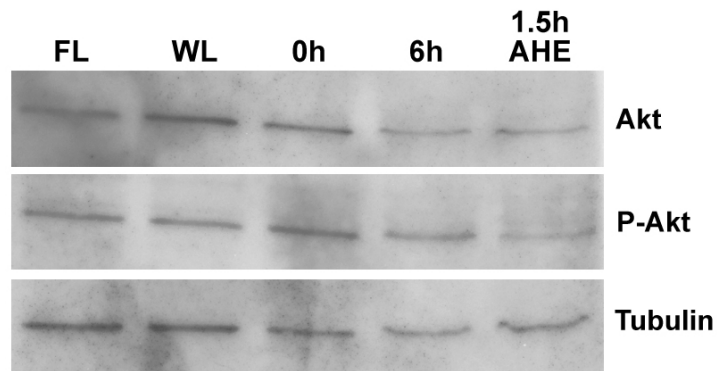

Supplement: NIHMS74213-supplement-01.pdf [file NIHMS74213-supplement-01.pdf]
